# Supplementary material
Source: PubMed Central journal article supplement (PMC6752323)

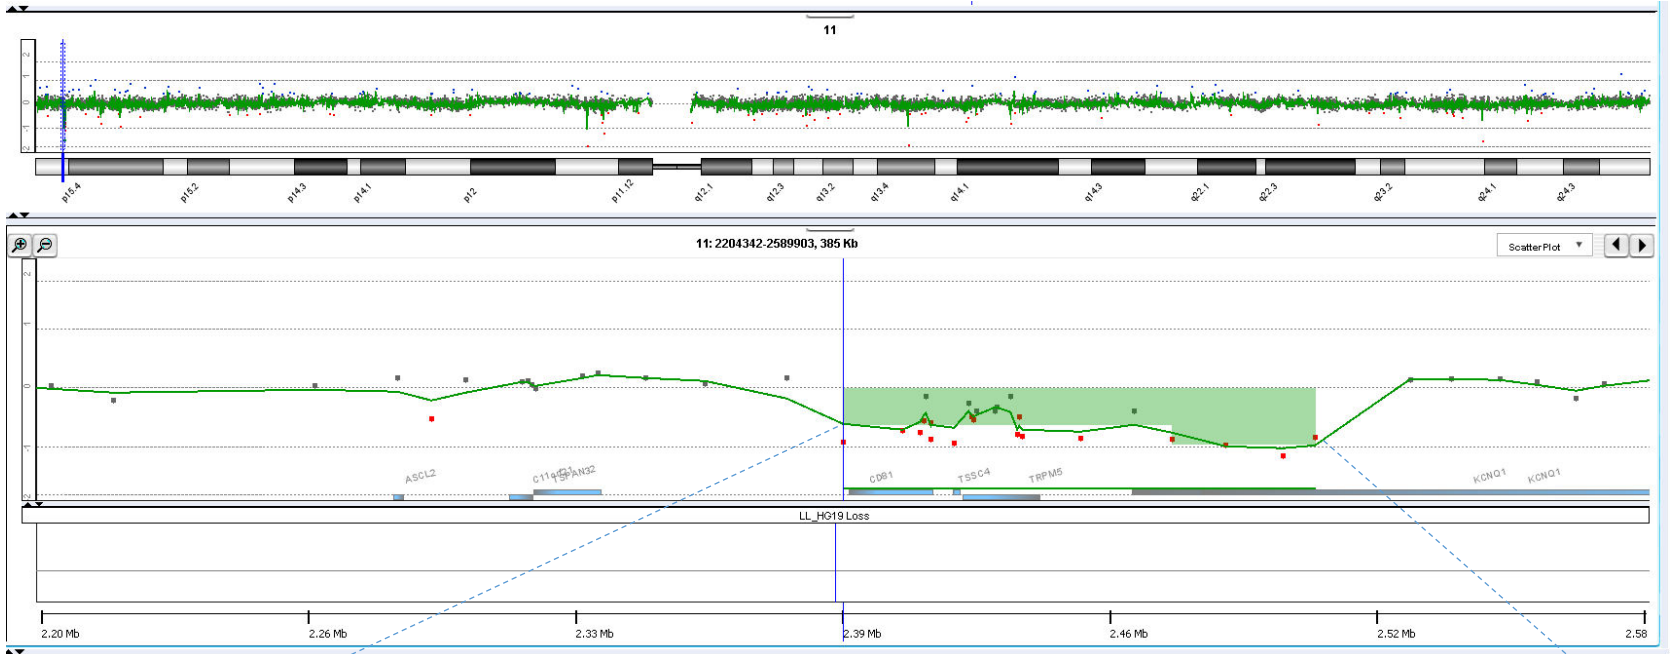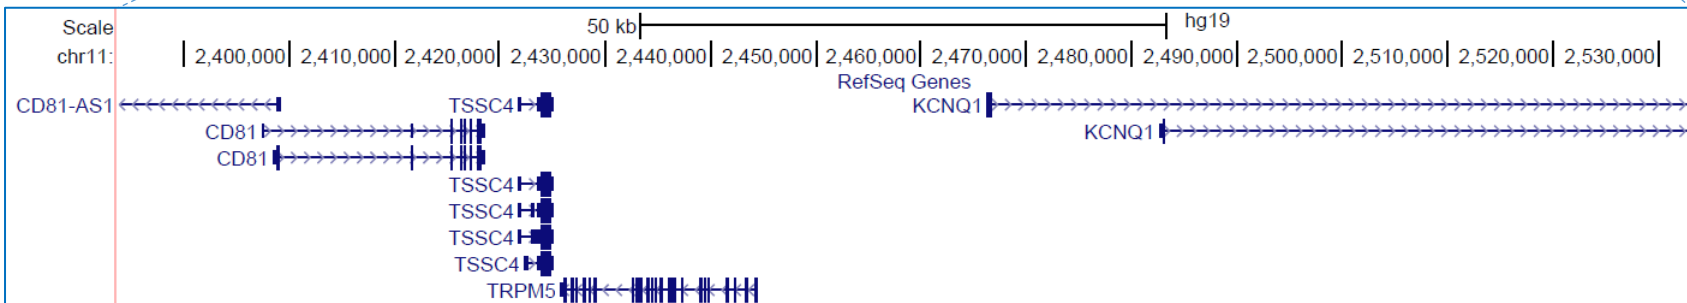

Supplement: 41436_2018_416_MOESM2_ESM.pdf [file 41436_2018_416_MOESM2_ESM.pdf]

**A**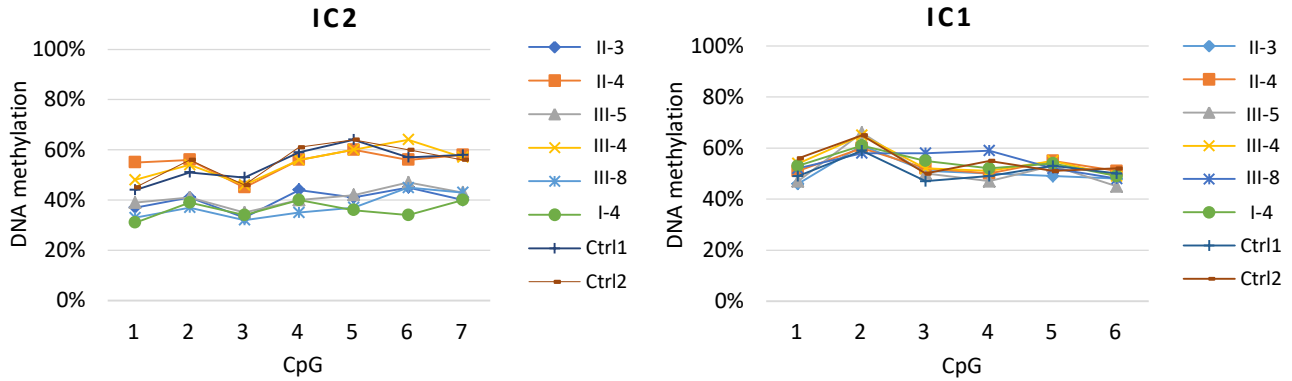**B**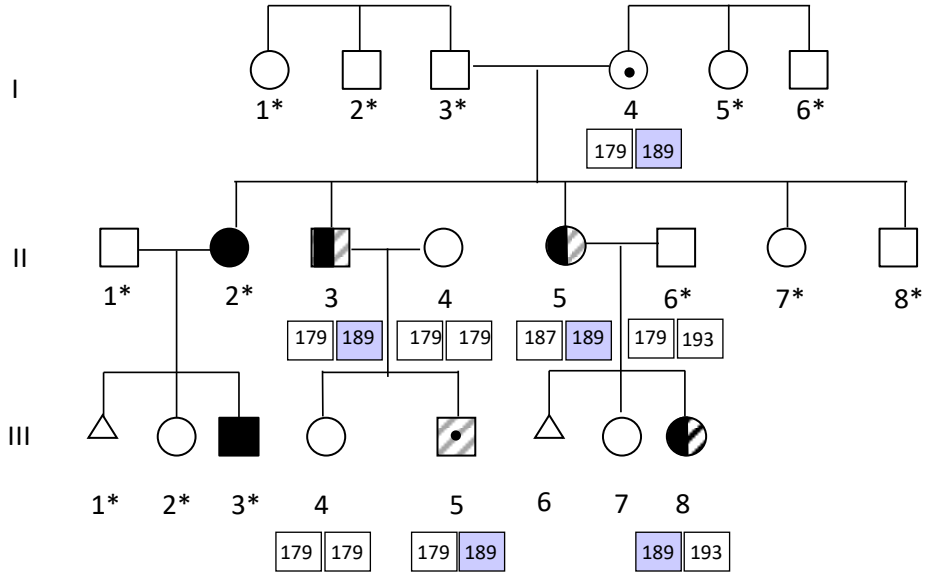

Supplement: 41436_2018_416_MOESM6_ESM.pdf [file 41436_2018_416_MOESM6_ESM.pdf]
